# Supplementary material for: Short-Term Effects of Atropine 0.01% on the Structure and Vasculature of the Choroid and Retina in Myopic Chinese Children
Source: PubMed Central journal article supplement — Ophthalmol Ther. 2022 Feb 20;11(2):833–56. doi: 10.1007/s40123-022-00476-0 (PMC8927555; doi:10.1007/s40123-022-00476-0), 2022-02-20
Supplement: 40123_2022_476_MOESM1_ESM.pdf [file 40123_2022_476_MOESM1_ESM.pdf]

# Short-term Effects of Atropine 0.01% on the Structure and Vasculature of the Choroid and Retina in Myopic Chinese Children

Yuliang Wang<sup>1,2,3,†</sup>, Xingxue Zhu<sup>1,2,3,†</sup>, Yi Xuan<sup>1</sup>, Min Wang<sup>1</sup>, Xingtao Zhou<sup>1,2,3</sup>,  
Xiaomei Qu<sup>1,2,3,\*</sup>

<sup>1</sup>Department of Ophthalmology and Vision Science, Eye & ENT Hospital, Fudan University, Shanghai, China

<sup>2</sup>NHC Key Laboratory of Myopia, Fudan University, Shanghai, China

<sup>3</sup>Laboratory of Myopia, Chinese Academy of Medical Sciences, Shanghai, China

† Yuliang Wang and Xingxue Zhu contributed equally as co-first authors.

\* Correspondence:

Xiaomei Qu

[quxiaomei2002@126.com](mailto:quxiaomei2002@126.com)

**Table S1. Eligibility criteria for the study**

---

Children aged 6 to 14 years

Refractive error of spherical equivalent between -0.50 D to -6.00 D\*

Astigmatism of -2.50 D or less†

Best-corrected visual acuity of logMAR 0.1 or better in both eyes

No history of other ocular diseases (i.e. amblyopia, strabismus, cataract, glaucoma, and congenital retinal diseases)

No history of systemic disorders which might affect the ocular circulation

No allergy to atropine, tropicamide and cyclopentolate

No current or previous use of atropine or pirenzepine, contact lenses or other forms of treatment that might affect myopia progression

Willing to comply with the allocated treatment and follow-up schedule

---

logMAR = logarithm of the minimum angle of resolution.

\*Refraction was measured with cycloplegic retinoscopy. Refractive error of spherical equivalent was defined as spherical refraction plus half the cylinder refraction.

**Table S2. Baseline characteristics of the enrolled subjects by Gender.**

|                         | Female<br>Mean (SD)<br>N=20 | Male<br>Mean (SD)<br>N=20 | ALL<br>Mean (SD)<br>N=40 | <i>P</i><br>Value |
|-------------------------|-----------------------------|---------------------------|--------------------------|-------------------|
| Age (yr)                | 10.30 (1.63)                | 9.50 (1.79)               | 9.90 (1.74)              | 0.147             |
| SE (D)                  | -2.09 (1.55)                | -2.65 (1.73)              | -2.37 (1.65)             | 0.285             |
| AL (mm)                 | 24.16 (0.73)                | 24.97 (1.08)              | 24.57 (1.00)             | 0.008*            |
| BCVA (logMAR)           | 0.00 (0.01)                 | 0.01 (0.03)               | 0.01 (0.02)              | 0.515             |
| K1 (D)                  | 42.93 (1.37)                | 42.15 (1.33)              | 42.54 (1.39)             | 0.091             |
| K2 (D)                  | 44.21 (1.45)                | 43.44 (1.64)              | 43.83 (1.58)             | 0.127             |
| Km (D)                  | 43.57 (1.38)                | 42.15 (1.33)              | 43.19 (1.46)             | 0.053             |
| $\Delta$ K (D)          | -1.28 (0.57)                | -1.29 (0.58)              | -1.29 (0.56)             | 0.598             |
| ACD                     | 3.72 (0.19)                 | 3.83 (0.16)               | 3.78 (0.18)              | 0.051             |
| LT (mm)                 | 3.38 (0.13)                 | 3.41 (0.15)               | 3.40 (0.14)              | 0.541             |
| CCT ( $\mu$ m)          | 531.40 (34.79)              | 552.15 (30.00)            | 541.78 (33.74)           | 0.050             |
| ChT ( $\mu$ m))         | 233.41 (30.56)              | 248.06 (51.54)            | 240.74 (42.47)           | 0.283             |
| CCF (mm <sup>2</sup> )  | 2.19 (0.09)                 | 2.16 (0.13)               | 2.18 (0.11)              | 0.504             |
| RT-Whole ( $\mu$ m)     | 281.50 (8.82)               | 279.90 (11.03)            | 280.70 (9.89)            | 0.615             |
| RT-Fovea ( $\mu$ m)     | 237.45 (15.26)              | 245.45 (15.23)            | 241.45 (15.59)           | 0.105             |
| RT-ParaF ( $\mu$ m)     | 314.70 (11.78)              | 316.75 (11.70)            | 315.73 (11.64)           | 0.674             |
| RT-ParaF-S ( $\mu$ m)   | 319.50 (11.43)              | 320.85 (12.50)            | 320.18 (11.84)           | 0.723             |
| RT-ParaF-I ( $\mu$ m)   | 314.95 (12.79)              | 316.10 (11.38)            | 315.53 (11.96)           | 0.914             |
| RT-ParaF-N ( $\mu$ m)   | 318.15 (12.75)              | 321.85 (12.24)            | 320.00 (12.48)           | 0.430             |
| RT-ParaF-T ( $\mu$ m)   | 306.30 (11.54)              | 307.80 (12.30)            | 307.05 (11.80)           | 0.693             |
| RT-PeriFovea ( $\mu$ m) | 280.70 (9.40)               | 277.15 (12.06)            | 278.93 (11.04)           | 0.315             |
| RT-PeriF-S ( $\mu$ m)   | 284.10 (8.81)               | 280.30 (12.01)            | 282.20 (10.57)           | 0.261             |
| RT-PeriF-I ( $\mu$ m)   | 270.35 (11.31)              | 267.25 (12.63)            | 268.80 (11.94)           | 0.419             |
| RT-PeriF-N ( $\mu$ m)   | 300.95 (12.55)              | 296.20 (13.29)            | 298.58 (12.98)           | 0.252             |
| RT-PeriF-T ( $\mu$ m)   | 267.00 (9.71)               | 264.65 (13.06)            | 265.83 (11.42)           | 0.522             |
| sRVD-Whole (%)          | 47.96 (2.12)                | 47.96 (2.43)              | 47.96 (2.25)             | 1.000             |
| sRVD-Fovea (%)          | 18.17 (5.71)                | 22.18 (7.31)              | 20.18 (6.79)             | 0.061             |
| sRVD-ParaF (%)          | 50.34 (3.20)                | 48.63 (4.61)              | 49.48 (4.01)             | 0.182             |
| sRVD-ParaF-S (%)        | 50.89 (4.74)                | 49.93 (4.08)              | 50.41 (4.39)             | 0.343             |
| sRVD-ParaF-I (%)        | 49.78 (4.25)                | 47.15 (4.87)              | 48.47 (4.70)             | 0.076             |
| sRVD-ParaF-N (%)        | 50.15 (3.69)                | 47.43 (6.14)              | 48.79 (5.19)             | 0.099             |
| sRVD-ParaF-T (%)        | 50.49 (3.26)                | 49.99 (5.48)              | 50.24 (4.46)             | 0.516             |
| sRVD-PeriF (%)          | 48.29 (2.22)                | 48.66 (2.32)              | 48.47 (4.70)             | 0.614             |
| sRVD-PeriF-S (%)        | 48.29 (2.75)                | 48.31 (2.63)              | 48.30 (2.66)             | 0.977             |
| sRVD-PeriF-I (%)        | 48.32 (2.34)                | 49.29 (2.78)              | 48.80 (2.58)             | 0.240             |
| sRVD-PeriF-N (%)        | 52.97 (2.36)                | 53.31 (2.48)              | 53.14 (2.40)             | 0.664             |
| sRVD-PeriF-T (%)        | 43.63 (3.27)                | 43.72 (2.69)              | 43.67 (2.96)             | 0.925             |
| dRVD-Whole (%)          | 46.55 (4.99)                | 43.79 (4.02)              | 45.17 (4.69)             | 0.061             |
| dRVD-Fovea (%)          | 34.33 (7.13)                | 38.21 (6.92)              | 36.27 (7.21)             | 0.089             |

|                        |              |              |              |        |
|------------------------|--------------|--------------|--------------|--------|
| dRVD-ParaF (%)         | 54.37 (4.38) | 52.04 (3.61) | 54.10 (4.38) | 0.075  |
| dRVD-ParaF-S (%)       | 53.18 (5.69) | 50.33 (5.68) | 51.75 (5.79) | 0.122  |
| dRVD-ParaF-I (%)       | 50.75 (5.91) | 48.99 (5.08) | 49.87 (5.51) | 0.319  |
| dRVD-ParaF-N (%)       | 56.80 (3.63) | 54.42 (4.40) | 55.61 (4.16) | 0.071  |
| dRVD-ParaF-T (%)       | 56.71 (4.00) | 54.45 (2.07) | 55.58 (3.34) | 0.033* |
| dRVD-PeriF (%)         | 46.95 (5.40) | 43.81 (4.34) | 45.38 (5.09) | 0.050  |
| dRVD-PeriF-S (%)       | 45.89 (6.77) | 41.65 (5.01) | 43.77 (6.26) | 0.030* |
| dRVD-PeriF-I (%)       | 44.97 (6.25) | 42.62 (5.43) | 43.79 (5.90) | 0.212  |
| dRVD-PeriF-N (%)       | 46.40 (5.91) | 40.09 (4.87) | 44.24 (5.78) | 0.016* |
| dRVD-PeriF-T (%)       | 50.52 (4.92) | 48.92 (3.73) | 49.72 (4.39) | 0.254  |
| FAZ (mm <sup>2</sup> ) | 0.30 (0.10)  | 0.25 (0.10)  | 0.27 (0.10)  | 0.172  |

SE: spherical equivalent, AL: axial length, ChT: choroidal thickness, RT-: retinal thickness of different region, sRVD-: vessel density of the superficial retinal layer, dRVD-: vessel density of the deep retinal layer, FAZ: foveal avascular zone. Each retinal parameter was calculated over the foveal (Fovea), parafoveal (ParaF) and perifoveal (PeriF), in superior (S), nasal (N), inferior (I), temporal (T) quadrants. Whole means the overall average of retinal thickness or vessel density within central 6 x 6 mm macular area.

\* Between-group significant differences at  $P < 0.05$ .

**Table S3. Baseline characteristics of the enrolled subjects by age.**

|                         | 6-8            | 9-11            | 12-14          | <i>P</i> |
|-------------------------|----------------|-----------------|----------------|----------|
|                         | Mean (SD), N=8 | Mean (SD), N=24 | Mean (SD), N=8 | Value    |
| Female, n (%)           | 3 (37.5)       | 12 (50.0)       | 5 (62.5)       | 0.32     |
| SE (D)                  | -2.06 (1.82)   | -2.33 (1.53)    | -2.80 (1.93)   | 0.67     |
| AL (mm)                 | 24.49 (1.05)   | 24.54 (1.02)    | 24.72 (0.99)   | 0.40     |
| BCVA (logMAR)           | 0.03 (0.05)    | 0.00 (0.01)     | 0.00 (0.00)    | 0.09     |
| K1 (D)                  | 42.31 (1.17)   | 42.55 (1.40)    | 42.73 (1.67)   | 0.84     |
| K2 (D)                  | 43.36 (1.11)   | 43.76 (1.61)    | 44.50 (1.81)   | 0.34     |
| $\Delta$ K (D)          | -1.05 (0.45)   | -1.21 (0.47)    | -1.76 (0.71)   | 0.06     |
| ACD (mm)                | 3.79 (0.12)    | 3.77 (0.21)     | 3.77 (0.16)    | 0.98     |
| LT (mm)                 | 3.38 (0.09)    | 3.43 (0.14)     | 3.32 (0.13)    | 0.12     |
| CCT ( $\mu$ m)          | 534.50 (26.30) | 543.96 (34.12)  | 542.50 (41.83) | 0.80     |
| ChT ( $\mu$ m)          | 253.22 (48.40) | 243.33 (41.70)  | 220.47 (36.40) | 0.28     |
| CCF (mm <sup>2</sup> )  | 2.19 (0.11)    | 2.16 (0.12)     | 2.20 (0.10)    | 0.67     |
| RT-Whole ( $\mu$ m)     | 279.00 (11.36) | 280.79 (8.97)   | 282.13 (12.09) | 0.83     |
| RT-Fovea ( $\mu$ m)     | 240.75 (11.23) | 240.67 (16.98)  | 244.50 (16.33) | 0.83     |
| RT-ParaF ( $\mu$ m)     | 310.13 (16.15) | 316.63 (10.42)  | 318.63 (9.41)  | 0.30     |
| RT-ParaF-S ( $\mu$ m)   | 314.25 (15.04) | 321.17 (11.00)  | 323.13 (10.19) | 0.27     |
| RT-ParaF-I ( $\mu$ m)   | 311.50 (17.18) | 316.00 (10.51)  | 318.13 (10.58) | 0.53     |
| RT-ParaF-N ( $\mu$ m)   | 313.38 (17.55) | 321.38 (11.08)  | 322.50 (9.61)  | 0.24     |
| RT-ParaF-T ( $\mu$ m)   | 300.88 (15.62) | 307.79 (10.83)  | 311.00 (9.10)  | 0.21     |
| RT-PeriFovea ( $\mu$ m) | 277.88 (11.15) | 278.79 (10.42)  | 280.38 (13.94) | 0.90     |
| RT-PeriF-S ( $\mu$ m)   | 281.38 (9.52)  | 282.04 (9.36)   | 283.50 (15.53) | 0.92     |
| RT-PeriF-I ( $\mu$ m)   | 269.13 (12.52) | 267.96 (11.61)  | 271.00 (13.64) | 0.83     |
| RT-PeriF-N ( $\mu$ m)   | 296.75 (13.83) | 299.13 (12.51)  | 298.75 (15.11) | 0.91     |
| RT-PeriF-T ( $\mu$ m)   | 264.13 (10.18) | 265.67 (11.17)  | 268.00 (14.30) | 0.80     |
| sRVD-Whole (%)          | 47.10 (1.54)   | 48.55 (2.05)    | 47.01 (3.00)   | 0.12     |
| sRVD-Fovea (%)          | 20.95 (7.41)   | 20.43 (7.12)    | 18.64 (5.61)   | 0.77     |

|                        |               |              |              |       |
|------------------------|---------------|--------------|--------------|-------|
| sRVD -ParaF (%)        | 46.81 (5.72)  | 50.52 (3.00) | 49.04 (3.91) | 0.19  |
| sRVD -ParaF-S (%)      | 48.39 (36.17) | 51.33 (3.24) | 49.65 (5.33) | 0.35  |
| sRVD -ParaF-I (%)      | 44.94 (4.85)  | 50.08 (4.35) | 47.14 (3.51) | 0.01* |
| sRVD -ParaF-N (%)      | 46.93 (7.25)  | 49.25 (4.36) | 49.28 (5.47) | 0.78  |
| sRVD -ParaF-T (%)      | 47.03 (6.85)  | 51.40 (2.88) | 49.98 (4.47) | 0.16  |
| sRVD -PeriF (%)        | 47.80 (1.36)  | 49.00 (2.06) | 47.56 (3.16) | 0.19  |
| sRVD -PeriF-S (%)      | 47.28 (2.06)  | 48.88 (2.34) | 47.58 (3.77) | 0.24  |
| sRVD -PeriF-I (%)      | 48.69 (2.17)  | 49.28 (2.49) | 47.49 (3.05) | 0.24  |
| sRVD -PeriF-N (%)      | 52.23 (1.88)  | 53.64 (2.27) | 52.54 (3.04) | 0.26  |
| sRVD -PeriF-T (%)      | 43.10 (2.14)  | 44.20 (2.89) | 42.66 (3.77) | 0.28  |
| dRVD-Whole (%)         | 46.20 (3.99)  | 45.57 (5.00) | 42.94 (4.15) | 0.31  |
| dRVD-Fovea (%)         | 37.70 (4.70)  | 36.35 (8.48) | 34.58 (5.05) | 0.70  |
| dRVD-ParaF (%)         | 55.44 (3.31)  | 52.90 (4.21) | 51.88 (4.24) | 0.20  |
| dRVD-ParaF-S (%)       | 53.41 (6.40)  | 51.96 (5.73) | 49.46 (5.37) | 0.39  |
| dRVD-ParaF-I (%)       | 52.54 (3.56)  | 49.58 (5.84) | 48.06 (5.71) | 0.25  |
| dRVD-ParaF-N (%)       | 56.81 (3.54)  | 55.30 (3.20) | 55.15 (3.73) | 0.51  |
| dRVD-ParaF-T (%)       | 58.95 (4.17)  | 54.73 (3.80) | 54.89 (3.97) | 0.04* |
| dRVD-PeriF (%)         | 46.15 (4.15)  | 45.93 (5.44) | 42.95 (4.63) | 0.33  |
| dRVD-PeriF-S (%)       | 43.29 (4.70)  | 44.70 (6.92) | 41.46 (5.43) | 0.45  |
| dRVD-PeriF-I (%)       | 44.35 (5.16)  | 44.66 (6.19) | 40.61 (5.17) | 0.24  |
| dRVD-PeriF-N (%)       | 46.26 (6.19)  | 44.32 (5.57) | 41.99 (5.93) | 0.34  |
| dRVD-PeriF-T (%)       | 50.66 (3.12)  | 50.08 (4.74) | 47.71 (4.17) | 0.34  |
| FAZ (mm <sup>2</sup> ) | 0.24 (0.07)   | 0.29 (0.12)  | 0.27 (0.10)  | 0.57  |

SE: spherical equivalent, AL: axial length, ChT: choroidal thickness, RT-: retinal thickness of different region, sRVD-: vessel density of the superficial retinal layer, dRVD-: vessel density of the deep retinal layer, FAZ: foveal avascular zone. Each retinal parameter was calculated over the foveal (Fovea), parafoveal (ParaF) and perifoveal (PeriF), in superior (S), nasal (N), inferior (I), temporal (T) quadrants. Whole means the overall average of retinal thickness or vessel density within central 6 x 6 mm macular area.

\* Between-group significant differences at  $P < 0.05$ .

**Table S4. Baseline characteristics of the enrolled subjects by refraction.**

|                         | Low Myopia<br>Mean (SD), N=28 | Moderate Myopia<br>Mean (SD), N=12 | <i>P</i> Value |
|-------------------------|-------------------------------|------------------------------------|----------------|
| Age (yr)                | 10.00 (1.72)                  | 9.67 (1.83)                        | 0.59           |
| Female, n (%)           | 15 (53.6)                     | 5 (41.7)                           | 0.49           |
| AL (mm)                 | 24.19 (0.65)                  | 25.43 (1.14)                       | 0.003*         |
| BCVA (logMAR)           | 0.00 (0.01)                   | 0.02 (0.04)                        | 0.51           |
| K1 (D)                  | 42.61 (1.23)                  | 42.38 (1.76)                       | 0.51           |
| K2 (D)                  | 43.83 (1.36)                  | 43.81 (2.06)                       | 0.92           |
| $\Delta$ K (D)          | -1.23 (0.34)                  | -1.42 (0.90)                       | 0.48           |
| ACD (mm)                | 3.77 (0.18)                   | 3.79 (0.17)                        | 0.91           |
| LT (mm)                 | 3.40 (0.13)                   | 3.39 (0.16)                        | 0.84           |
| CCT ( $\mu$ m)          | 540.43 (38.57)                | 544.92 (19.21)                     | 0.63           |
| ChT ( $\mu$ m)          | 234.71 (40.75)                | 227.71 (57.19)                     | 0.80           |
| CCF (mm <sup>2</sup> )  | 2.18 (0.12)                   | 2.18 (0.09)                        | 0.97           |
| RT-Whole ( $\mu$ m)     | 281.36 (9.83)                 | 279.17 (10.29)                     | 0.53           |
| RT-Fovea ( $\mu$ m)     | 239.36 (15.87)                | 246.33 (14.36)                     | 0.20           |
| RT-ParaF ( $\mu$ m)     | 315.29 (12.54)                | 316.75 (9.60)                      | 0.72           |
| RT-ParaF-S ( $\mu$ m)   | 306.86 (12.58)                | 307.50 (10.23)                     | 0.88           |
| RT-ParaF-I ( $\mu$ m)   | 320.11 (12.56)                | 320.33 (10.47)                     | 0.96           |
| RT-ParaF-N ( $\mu$ m)   | 319.11 (13.87)                | 322.08 (8.53)                      | 0.37           |
| RT-ParaF-T ( $\mu$ m)   | 314.82 (12.66)                | 317.17 (10.48)                     | 0.58           |
| RT-PeriFovea ( $\mu$ m) | 279.57 (10.74)                | 277.42 (12.06)                     | 0.58           |
| RT-PeriF-S ( $\mu$ m)   | 267.36 (10.82)                | 262.25 (12.45)                     | 0.20           |
| RT-PeriF-I ( $\mu$ m)   | 283.29 (10.20)                | 279.67 (11.43)                     | 0.33           |
| RT-PeriF-N ( $\mu$ m)   | 298.18 (12.85)                | 299.50 (13.82)                     | 0.77           |
| RT-PeriF-T ( $\mu$ m)   | 269.43 (11.95)                | 267.33 (12.30)                     | 0.62           |
| sRVD-Whole (%)          | 48.08 (2.17)                  | 47.66 (2.50)                       | 0.59           |
| sRVD-Fovea (%)          | 19.69 (6.58)                  | 21.32 (7.41)                       | 0.49           |

|                        |              |              |      |
|------------------------|--------------|--------------|------|
| sRVD -ParaF (%)        | 49.78 (4.05) | 48.80 (4.01) | 0.48 |
| sRVD -ParaF-S (%)      | 50.70 (4.38) | 49.17 (4.64) | 0.22 |
| sRVD -ParaF-I (%)      | 50.29 (4.74) | 50.68 (3.60) | 0.94 |
| sRVD -ParaF-N (%)      | 49.09 (5.25) | 48.08 (5.20) | 0.49 |
| sRVD -ParaF-T (%)      | 48.96 (4.28) | 47.3 (5.59)  | 0.31 |
| sRVD -PeriF (%)        | 48.50 (2.17) | 48.40 (2.52) | 0.90 |
| sRVD -PeriF-S (%)      | 43.88 (2.94) | 43.18 (3.06) | 0.50 |
| sRVD -PeriF-I (%)      | 48.23 (2.60) | 48.46 (2.90) | 0.81 |
| sRVD -PeriF-N (%)      | 52.97 (2.32) | 53.53 (2.63) | 0.50 |
| sRVD -PeriF-T (%)      | 48.94 (2.34) | 48.47 (3.16) | 0.60 |
| dRVD-Whole (%)         | 45.32 (4.81) | 44.81 (4.60) | 0.76 |
| dRVD-Fovea (%)         | 35.46 (7.11) | 38.16 (7.39) | 0.28 |
| dRVD-ParaF (%)         | 53.36 (4.34) | 52.83 (3.77) | 0.72 |
| dRVD-ParaF-S (%)       | 55.44 (3.66) | 55.90 (2.56) | 0.69 |
| dRVD-ParaF-I (%)       | 52.20 (6.01) | 50.70 (5.36) | 0.46 |
| dRVD-ParaF-N (%)       | 55.63 (4.01) | 55.56 (4.68) | 0.96 |
| dRVD-ParaF-T (%)       | 50.18 (5.96) | 49.14 (4.45) | 0.59 |
| dRVD-PeriF (%)         | 45.60 (5.18) | 44.87 (5.06) | 0.68 |
| dRVD-PeriF-S (%)       | 50.05 (4.50) | 48.96 (4.18) | 0.48 |
| dRVD-PeriF-I (%)       | 43.62 (6.40) | 44.12 (6.18) | 0.82 |
| dRVD-PeriF-N (%)       | 44.61 (5.72) | 43.39 (6.08) | 0.72 |
| dRVD-PeriF-T (%)       | 44.12 (6.22) | 43.02 (5.23) | 0.59 |
| FAZ (mm <sup>2</sup> ) | 0.28 (0.10)  | 0.27 (0.11)  | 0.84 |

SE: spherical equivalent, AL: axial length, ChT: choroidal thickness, RT-: retinal thickness of different region, sRVD-: vessel density of the superficial retinal layer, dRVD-: vessel density of the deep retinal layer, FAZ: foveal avascular zone. Each retinal parameter was calculated over the foveal (Fovea), parafoveal (ParaF) and perifoveal (PeriF), in superior (S), nasal (N), inferior (I), temporal (T) quadrants. Whole means the overall average of retinal thickness or vessel density within central 6 x 6 mm macular area.

\* Between-group significant differences at  $P < 0.05$ .

**Table S5. Correlation between the change of choroidal and retinal structural and vascular parameters in control eyes over 3 months\*.**

|               | ChT             | RT-<br>Whole                     | RT-<br>Fovea                 | RT-<br>ParaF                 | RT-<br>PeriF    | sVRD<br>-                        | sRVD<br>-                        | sRVD<br>-                        | sRVD<br>-       | dVRD<br>-                        | dRVD<br>-       | dRVD<br>-                        | dRVD<br>-                     | SE                            | AL    |
|---------------|-----------------|----------------------------------|------------------------------|------------------------------|-----------------|----------------------------------|----------------------------------|----------------------------------|-----------------|----------------------------------|-----------------|----------------------------------|-------------------------------|-------------------------------|-------|
|               |                 |                                  |                              |                              |                 | Whole                            | Fovea                            | ParaF                            | PeriF           | Whole                            | Fovea           | ParaF                            | PeriF                         |                               |       |
| ChT           | 1.000           |                                  |                              |                              |                 |                                  |                                  |                                  |                 |                                  |                 |                                  |                               |                               |       |
| RT-<br>Whole  | 0.227<br>0.365  | 1.000                            |                              |                              |                 |                                  |                                  |                                  |                 |                                  |                 |                                  |                               |                               |       |
| RT-<br>Fovea  | 0.275<br>0.269  | <b>0.592</b><br><b>0.010</b>     | 1.000                        |                              |                 |                                  |                                  |                                  |                 |                                  |                 |                                  |                               |                               |       |
| RT-<br>ParaF  | 0.176<br>0.485  | <b>0.829</b><br><b>&lt;0.001</b> | <b>0.728</b><br><b>0.001</b> | 1.000                        |                 |                                  |                                  |                                  |                 |                                  |                 |                                  |                               |                               |       |
| RT-<br>PeriF  | 0.024<br>0.924  | <b>0.903</b><br><b>&lt;0.001</b> | <b>0.491</b><br><b>0.039</b> | <b>0.686</b><br><b>0.002</b> | 1.000           |                                  |                                  |                                  |                 |                                  |                 |                                  |                               |                               |       |
| sVD-<br>Whole | 0.106<br>0.675  | 0.440<br>0.067                   | 0.241<br>0.336               | 0.345<br>0.161               | 0.414<br>0.088  | 1.000                            |                                  |                                  |                 |                                  |                 |                                  |                               |                               |       |
| sVD-<br>Fovea | 0.051<br>0.842  | 0.362<br>0.140                   | 0.275<br>0.270               | 0.410<br>0.091               | 0.417<br>0.085  | <b>0.632</b><br><b>0.005</b>     | 1.000                            |                                  |                 |                                  |                 |                                  |                               |                               |       |
| sVD-<br>ParaF | 0.078<br>0.757  | 0.419<br>0.083                   | 0.330<br>0.182               | <b>0.493</b><br><b>0.038</b> | 0.434<br>0.072  | <b>0.886</b><br><b>&lt;0.001</b> | <b>0.742</b><br><b>&lt;0.001</b> | 1.000                            |                 |                                  |                 |                                  |                               |                               |       |
| sVD-<br>PeriF | 0.088<br>0.729  | 0.391<br>0.109                   | 0.229<br>0.360               | 0.272<br>0.275               | 0.356<br>0.147  | <b>0.977</b><br><b>&lt;0.001</b> | <b>0.561</b><br><b>0.016</b>     | <b>0.797</b><br><b>&lt;0.001</b> | 1.000           |                                  |                 |                                  |                               |                               |       |
| dVD-<br>Whole | 0.293<br>0.238  | 0.072<br>0.777                   | -0.207<br>0.410              | -0.145<br>0.565              | 0.112<br>0.657  | 0.136<br>0.590                   | -0.109<br>0.667                  | -0.144<br>0.569                  | 0.249<br>0.319  | 1.0<br>00                        |                 |                                  |                               |                               |       |
| dVD-<br>Fovea | -0.096<br>0.705 | 0.273<br>0.273                   | 0.127<br>0.615               | 0.272<br>0.276               | 0.433<br>0.073  | 0.400<br>0.100                   | <b>0.727</b><br><b>0.001</b>     | 0.468<br>0.050                   | 0.377<br>0.123  | 0.387<br>0.112                   | 1.000           |                                  |                               |                               |       |
| dVD-<br>ParaF | 0.408<br>0.093  | 0.045<br>0.860                   | -0.163<br>0.518              | -0.230<br>0.359              | 0.061<br>0.811  | 0.033<br>0.897                   | -0.285<br>0.252                  | -0.231<br>0.356                  | 0.129<br>0.610  | <b>0.914</b><br><b>&lt;0.001</b> | 0.213<br>0.396  | 1.000                            |                               |                               |       |
| dVD-<br>PeriF | 0.315<br>0.203  | 0.071<br>0.780                   | -0.204<br>0.418              | -0.118<br>0.642              | 0.097<br>0.702  | 0.204<br>0.416                   | -0.062<br>0.807                  | -0.072<br>0.778                  | 0.320<br>0.195  | <b>0.990</b><br><b>&lt;0.001</b> | 0.384<br>0.116  | <b>0.875</b><br><b>&lt;0.001</b> | 1.000                         |                               |       |
| SE            | 0.358<br>0.145  | 0.387<br>0.113                   | -0.039<br>0.877              | 0.376<br>0.124               | 0.317<br>0.200  | 0.170<br>0.499                   | -0.068<br>0.789                  | 0.150<br>0.551                   | 0.173<br>0.492  | 0.397<br>0.103                   | 0.171<br>0.498  | 0.321<br>0.193                   | 0.423<br>0.080                | 1.000                         |       |
| AL            | -0.342<br>0.164 | <b>-0.530</b><br><b>0.024</b>    | -0.105<br>0.679              | -0.343<br>0.163              | -0.439<br>0.068 | -0.290<br>0.243                  | -0.047<br>0.854                  | -0.204<br>0.418                  | -0.320<br>0.195 | <b>-0.514</b><br><b>0.029</b>    | -0.244<br>0.329 | <b>-0.516</b><br><b>0.028</b>    | <b>-0.520</b><br><b>0.027</b> | <b>-0.716</b><br><b>0.001</b> | 1.000 |

SE: spherical equivalent, AL: axial length, ChT: choroidal thickness, RT-: retinal thickness of different region, sRVD-: vessel density of the superficial retinal layer, dRVD-: vessel density of the deep retinal layer, FAZ: foveal avascular zone. Each retinal parameter was calculated over the foveal (Fovea), parafoveal (ParaF) and perifoveal (PeriF), in superior (S), nasal (N), inferior (I), temporal (T) quadrants. Whole means the overall average of retinal thickness or vessel density within central 6 x 6 mm macular area.

\*The upper row value of each cell represents correlation coefficient (r) and the lower row value represents statistical difference (P value). Bold values represent a significant difference ( $P < 0.05$ ).
